# Supplementary material for: KRAS Inhibitors Are Potential Prophylaxis for Colorectal Cancer Metachronous Metastasis
Source: Preprints.org preprint supplement (doi:10.20944/preprints202403.1095.v1), 2024-03-21
Supplement: Supplementary file 1 [file supplementary%20table%20s1.pdf]

Supplementary table S1A. ICGC-ARGO baseline

| Clinical characteristics | n(%)                     |                        |                  | P      |
|--------------------------|--------------------------|------------------------|------------------|--------|
|                          | KRAS wildtype<br>(n=351) | KRAS mutant<br>(n=286) | Total<br>(n=637) |        |
| Gender                   |                          |                        |                  | .112   |
| male                     | 200 (57.0)               | 144 (50.3)             | 344 (54.0)       |        |
| female                   | 151 (43.0)               | 142 (49.7)             | 293 (46.0)       |        |
| age                      |                          |                        |                  | .750   |
| <50                      | 81 (23.1)                | 70 (24.5)              | 151 (23.7)       |        |
| ≥50                      | 270 (76.9)               | 216 (75.5)             | 486 (76.3)       |        |
| CMS                      |                          |                        |                  | <0.001 |
| 1                        | 30 (8.5)                 | 35 (12.2)              | 65 (10.2)        |        |
| 2                        | 157 (44.7)               | 70 (24.5)              | 227 (35.6)       |        |
| 3                        | 21 (6.0)                 | 67 (23.4)              | 88 (13.8)        |        |
| 4                        | 105 (29.9)               | 64 (22.4)              | 169 (26.5)       |        |
| NA                       | 38 (10.8)                | 50 (17.5)              | 88 (13.8)        |        |
| pT stage                 |                          |                        |                  | .223   |
| 1                        | 27 (7.7)                 | 16 (5.6)               | 43 (6.8)         |        |
| 2                        | 66 (18.8)                | 72 (25.2)              | 138 (21.7)       |        |
| 3                        | 233 (66.4)               | 179 (62.6)             | 412 (64.7)       |        |
| 4                        | 25 (7.1)                 | 19 (6.6)               | 44 (6.9)         |        |
| pN stage                 |                          |                        |                  | .289   |
| N0                       | 224 (63.8)               | 194 (67.8)             | 418 (65.6)       |        |
| N+                       | 127 (36.2)               | 92 (32.2)              | 219 (34.4)       |        |
| Metachronous metastasis  |                          |                        |                  | .040   |
| No                       | 320 (91.2)               | 246 (86.0)             | 566 (88.9)       |        |
| Yes                      | 31 (8.8)                 | 40 (14.0)              | 71 (11.1)        |        |

Supplementary table S1B. MSKCC baseline

| Clinical characteristics | n(%)                     |                        |                  | P    |
|--------------------------|--------------------------|------------------------|------------------|------|
|                          | KRAS wildtype<br>(n=213) | KRAS mutant<br>(n=144) | Total<br>(n=357) |      |
| Gender                   |                          |                        |                  | .003 |
| male                     | 137(38.4)                | 70(19.6)               | 207(58.0)        |      |
| female                   | 76(21.3)                 | 74(20.7)               | 150(42.0)        |      |
| age                      |                          |                        |                  | .060 |
| <50                      | 68(19.0)                 | 60(16.8)               | 128(35.9)        |      |
| ≥50                      | 145(40.6)                | 84(23.5)               | 229(64.1)        |      |
| CMS                      |                          |                        |                  | .001 |
| 1                        | 3(0.8)                   | 9(2.5)                 | 12(3.4)          |      |
| 2                        | 20(5.6)                  | 5(1.4)                 | 25(7.0)          |      |
| 3                        | 10(2.8)                  | 15(4.2)                | 25(7.0)          |      |
| 4                        | 24(6.7)                  | 8(2.2)                 | 32(9.0)          |      |
| NA                       | 156(43.7)                | 107(30.0)              | 263(73.7)        |      |
| Tumor location           |                          |                        |                  | .675 |
| upper                    | 68(19.0)                 | 43(12.0)               | 111(31.1)        |      |
| middle                   | 96(26.9)                 | 61(17.1)               | 157(44.0)        |      |
| lower                    | 48(13.4)                 | 38(10.6)               | 86(24.1)         |      |
| NA                       | 1(0.3)                   | 2(0.6)                 | 3(0.8)           |      |
| ypT stage                |                          |                        |                  | .991 |
| 0-Tis                    | 42(11.8)                 | 30(8.4)                | 72(20.2)         |      |
| 1                        | 12(3.4)                  | 8(2.2)                 | 20(5.6)          |      |
| 2                        | 50(14.0)                 | 32(9.0)                | 82(23.0)         |      |
| 3                        | 42(11.8)                 | 26(7.3)                | 68((19.0)        |      |
| 4                        | 4(1.1)                   | 2(0.6)                 | 6(1.7)           |      |
| NA                       | 63(17.6)                 | 46(12.9)               | 109(30.5)        |      |
| ypN stage                |                          |                        |                  | .978 |
| N0                       | 109(30.5)                | 72(20.2)               | 181(50.7)        |      |
| N+                       | 27(7.6)                  | 18(5.0)                | 45(12.6)         |      |
| NA                       | 77(21.6)                 | 54(15.1)               | 213(59.7)        |      |
| Metachronous metastasis  |                          |                        |                  | .077 |
| No                       | 185(51.8)                | 115(32.2)              | 300(84.0)        |      |
| Yes                      | 28(7.8)                  | 29(8.1)                | 57(16.0)         |      |

Supplementary table S1C. Sidra-LUMC AC-ICAM baseline

| Clinical characteristics | n(%)                     |                       |                  | P      |
|--------------------------|--------------------------|-----------------------|------------------|--------|
|                          | KRAS wildtype<br>(n=147) | KRAS mutant<br>(n=77) | Total<br>(n=224) |        |
| Gender                   |                          |                       |                  | .972   |
| male                     | 76(33.9)                 | 40(17.9)              | 116(51.8)        |        |
| female                   | 71(31.7)                 | 37(16.5)              | 108(48.2)        |        |
| age                      |                          |                       |                  | .776   |
| <50                      | 10(4.5)                  | 4(1.8)                | 14(6.3)          |        |
| ≥50                      | 137(61.2)                | 73(32.6)              | 210(93.8)        |        |
| CMS                      |                          |                       |                  | .838   |
| 1                        | 21(9.4)                  | 9(4.0)                | 30(13.4)         |        |
| 2                        | 37(16.5)                 | 17(7.6)               | 54(24.1)         |        |
| 3                        | 32(14.3)                 | 15(6.7)               | 47(21.0)         |        |
| 4                        | 27(12.1)                 | 16(7.1)               | 43(19.2)         |        |
| mixed                    | 30(13.4)                 | 20(8.9)               | 50(22.2)         |        |
| Tumor location           |                          |                       |                  | .079   |
| Right hemicolon          | 66(29.5)                 | 35(15.6)              | 101(45.1)        |        |
| Transverse colon         | 6(2.7)                   | 9(4.0)                | 15(6.7)          |        |
| Left hemicolon           | 75(33.5)                 | 33(14.7)              | 108(48.2)        |        |
| pT stage                 |                          |                       |                  | .292   |
| 1                        | 9(4.0)                   | 4(1.8)                | 13(5.8)          |        |
| 2                        | 35(15.6)                 | 11(4.9)               | 46(20.5)         |        |
| 3                        | 93(41.5)                 | 58(25.9)              | 151(67.4)        |        |
| 4                        | 10(4.5)                  | 4(1.8)                | 14(6.3)          |        |
| pN stage                 |                          |                       |                  | <0.001 |
| N0                       | 129(57.6)                | 13(5.8)               | 142(63.4)        |        |
| N+                       | 18(8.0)                  | 64(28.6)              | 82(36.6)         |        |
| Metachronous metastasis  |                          |                       |                  | .091   |
| No                       | 129(57.9)                | 61(27.2)              | 190(84.8)        |        |
| Yes                      | 18(8.0)                  | 16(7.1)               | 34(15.2)         |        |

Supplementary table S1D. ICGC-ARGO KRAS<sup>mut</sup> chemotherapy baseline

| Clinical characteristics | Before matching (n=)(%)   |                        | P      | After matching (n=)(%)   |                       | P    |
|--------------------------|---------------------------|------------------------|--------|--------------------------|-----------------------|------|
|                          | No adjuvant chemo (n=171) | Adjuvant chemo (n=115) |        | No adjuvant chemo (n=79) | Adjuvant chemo (n=79) |      |
| gender                   |                           |                        | .074   |                          |                       | .750 |
| male                     | 94 (55.0)                 | 50 (43.5)              |        | 41 (51.9)                | 44 (55.7)             |      |
| female                   | 77 (45.0)                 | 65 (56.5)              |        | 38 (48.1)                | 35 (44.3)             |      |
| age                      |                           |                        | .001   |                          |                       | .001 |
| <50                      | 30 (17.5)                 | 40 (34.8)              |        | 9 (11.4)                 | 28 (35.4)             |      |
| ≥50                      | 141 (82.5)                | 75 (65.2)              |        | 70 (88.6)                | 51 (64.6)             |      |
| pT stage                 |                           |                        | <0.001 |                          |                       | .387 |
| 1                        | 15 (8.8)                  | 1 (0.9)                |        | 2 (2.5)                  | 0                     |      |
| 2                        | 58 (33.9)                 | 14 (12.2)              |        | 9 (11.4)                 | 9 (11.4)              |      |
| 3                        | 90 (52.6)                 | 89 (77.4)              |        | 62 (78.5)                | 60 (75.9)             |      |
| 4                        | 8 (4.7)                   | 11 (9.6)               |        | 6 (7.6)                  | 10 (12.7)             |      |
| pN stage                 |                           |                        | <0.001 |                          |                       | .868 |
| N0                       | 143 (83.6)                | 51 (44.3)              |        | 51 (64.6)                | 50 (63.3)             |      |
| N+                       | 28(16.4)                  | 64(55.7)               |        | 28(10.4)                 | 29(12.5)              |      |

Supplementary table S1E. ICGC-ARGO KRAS<sup>wt</sup> CRC chemotherapy baseline

| Clinical characteristics | Before matching (n=)(%)   |                        | P      | After matching (n=)(%)   |                       | P     |
|--------------------------|---------------------------|------------------------|--------|--------------------------|-----------------------|-------|
|                          | No adjuvant chemo (n=226) | Adjuvant chemo (n=175) |        | No adjuvant chemo (n=81) | Adjuvant chemo (n=81) |       |
| gender                   |                           |                        | 1.000  |                          |                       | .874  |
| male                     | 130 (57.5)                | 101 (57.7)             |        | 48 (59.3)                | 46 (56.8)             |       |
| female                   | 96 (42.5)                 | 74 (42.3)              |        | 33 (40.7)                | 35 (43.2)             |       |
| age                      |                           |                        | .009   |                          |                       | .167  |
| <50                      | 41 (18.1)                 | 52 (29.7)              |        | 12 (14.8)                | 20 (24.7)             |       |
| ≥50                      | 185 (81.9)                | 123 (70.3)             |        | 69 (85.2)                | 61 (75.3)             |       |
| pT stage                 |                           |                        | <0.001 |                          |                       | .637  |
| 1                        | 24 (10.6)                 | 5 (2.9)                |        | 3 (3.7)                  | 1 (1.2)               |       |
| 2                        | 70 (31.0)                 | 13 (7.4)               |        | 5 (6.2)                  | 8 (9.9)               |       |
| 3                        | 123 (54.4)                | 140 (80.0)             |        | 64 (79.0)                | 63 (77.8)             |       |
| 4                        | 9 (4.0)                   | 17 (9.7)               |        | 9 (11.1)                 | 9 (11.1)              |       |
| pN stage                 |                           |                        | <0.001 |                          |                       | 1.000 |
| N0                       | 192 (85.0)                | 54(30.9)               |        | 51 (63.0)                | 51 (63.0)             |       |
| N+                       | 34(15.0)                  | 121(69.1)              |        | 30(27.0)                 | 30(27.0)              |       |

Supplementary table S1F. MSKCC KRAS<sup>mut</sup> chemotherapy baseline

| Clinical characteristics | Before matching (n=)(%)  |                       | P    | After matching (n=)(%)   |                       | P     |
|--------------------------|--------------------------|-----------------------|------|--------------------------|-----------------------|-------|
|                          | No adjuvant chemo (n=52) | Adjuvant chemo (n=24) |      | No adjuvant chemo (n=24) | Adjuvant chemo (n=24) |       |
| gender                   |                          |                       | .344 |                          |                       | 1.000 |
| male                     | 20(26.3)                 | 12(15.8)              |      | 12                       | 12                    |       |
| female                   | 32(42.1)                 | 12(15.8)              |      | 12                       | 12                    |       |
| age                      |                          |                       | .715 |                          |                       | .562  |
| <50                      | 24(31.6)                 | 10(13.2)              |      | 12(25.0)                 | 10(20.8)              |       |
| ≥50                      | 28(36.8)                 | 14(18.4)              |      | 12(25.0)                 | 14(29.2)              |       |
| Tumor location           |                          |                       | .113 |                          |                       | .484  |
| upper                    | 22(28.9)                 | 5(6.6)                |      | 8(16.7)                  | 5(10.4)               |       |
| middle                   | 18(23.7)                 | 14(18.4)              |      | 10(20.8)                 | 14(29.2)              |       |
| lower                    | 12(15.8)                 | 5(6.6)                |      | 6(12.5)                  | 5(10.4)               |       |
| ypT stage                |                          |                       | .541 |                          |                       | 1.000 |
| 0-Tis                    | 16(21.1)                 | 4(5.3)                |      | 4(8.3)                   | 4(8.3)                |       |
| 1                        | 4(5.3)                   | 4(5.3)                |      | 4(8.3)                   | 4(8.3)                |       |
| 2                        | 17(22.4)                 | 9(11.8)               |      | 9(18.8)                  | 9(18.8)               |       |
| 3                        | 14(18.4)                 | 7(9.2)                |      | 7(14.6)                  | 7(14.6)               |       |
| 4                        | 1(1.3)                   | 0                     |      | 0                        | 0                     |       |
| ypN stage                |                          |                       | .708 |                          |                       | .731  |
| N0                       | 41(53.9)                 | 18(23.7)              |      | 19(39.6)                 | 18(37.5)              |       |
| N+                       | 11(14.5)                 | 6(7.9)                |      | 5(10.4)                  | 6(12.5)               |       |

Supplementary table S1G. MSKCC KRAS<sup>wt</sup> chemotherapy baseline

| Clinical characteristics | Before matching (n=)(%)  |                       | P    | After matching (n=)(%)   |                       | P    |
|--------------------------|--------------------------|-----------------------|------|--------------------------|-----------------------|------|
|                          | No adjuvant chemo (n=84) | Adjuvant chemo (n=32) |      | No adjuvant chemo (n=32) | Adjuvant chemo (n=32) |      |
| gender                   |                          |                       | .270 |                          |                       | .200 |
| male                     | 54(46.6)                 | 17(14.7)              |      | 22(34.4)                 | 17(26.6)              |      |
| female                   | 30(25.9)                 | 15(12.9)              |      | 10(15.6)                 | 15(23.4)              |      |
| age                      |                          |                       | .121 |                          |                       | .777 |
| <50                      | 34(29.3)                 | 8(6.9)                |      | 9(14.1)                  | 8(12.5)               |      |
| ≥50                      | 50(43.1)                 | 24(20.7)              |      | 23(35.9)                 | 24(37.5)              |      |
| Tumor location           |                          |                       | .855 |                          |                       | .855 |
| upper                    | 32(27.6)                 | 14(12.1)              |      | 13(20.3)                 | 14(21.9)              |      |
| middle                   | 38(32.8)                 | 13(11.2)              |      | 16(25.0)                 | 13(21.3)              |      |
| lower                    | 14(12.1)                 | 5(4.3)                |      | 3(4.7)                   | 5(7.8)                |      |
| ypT stage                |                          |                       | .512 |                          |                       | .750 |
| 0-Tis                    | 23(19.8)                 | 8(6.9)                |      | 8(12.5)                  | 8(12.5)               |      |
| 1                        | 6(5.2)                   | 3(2.6)                |      | 3(4.7)                   | 3(9.4)                |      |
| 2                        | 28(24.1)                 | 12(10.3)              |      | 13(20.34)                | 12(18.8)              |      |
| 3                        | 26(22.4)                 | 7(6.0)                |      | 8(12.5)                  | 7(10.9)               |      |
| 4                        | 1(0.9)                   | 2(1.7)                |      | 0                        | 2(3.1)                |      |
| ypN stage                |                          |                       | .120 |                          |                       | .708 |
| N0                       | 65(56.0)                 | 29(25.0)              |      | 27(42.2)                 | 29(45.3)              |      |
| N+                       | 19(16.4)                 | 3(2.6)                |      | 5(7.8)                   | 3(4.7)                |      |

Supplementary table S1H. Sidra-LUMC AC-ICAM KRAS<sup>mut</sup> CRC chemotherapy baseline

| Clinical characteristics | Before matching (n=)(%)  |                       | P      | After matching (n=)(%)   |                       | P     |
|--------------------------|--------------------------|-----------------------|--------|--------------------------|-----------------------|-------|
|                          | No adjuvant chemo (n=60) | Adjuvant chemo (n=17) |        | No adjuvant chemo (n=13) | Adjuvant chemo (n=13) |       |
| gender                   |                          |                       | .314   |                          |                       | .695  |
| male                     | 33 (42.9)                | 7 (9.1)               |        | 7(26.9)                  | 6(23.1)               |       |
| female                   | 27 (35.1)                | 10 (13.0)             |        | 6(23.1)                  | 7(26.9)               |       |
| age                      |                          |                       | .210   |                          |                       | 1.000 |
| <50                      | 2(2.6)                   | 2(2.6)                |        | 1(3.8)                   | 1(3.8)                |       |
| ≥50                      | 58(75.3)                 | 15(19.5)              |        | 12(46.2)                 | 12(46.2)              |       |
| Tumor location           |                          |                       | .005   |                          |                       | .760  |
| upper                    | 24(31.2)                 | 11(14.3)              |        | 8(30.8)                  | 9(34.6)               |       |
| middle                   | 4(5.2)                   | 5(6.5)                |        | 4(15.4)                  | 3(11.5)               |       |
| lower                    | 32(41.6)                 | 1(1.3)                |        | 1(3.8)                   | 1(3.8)                |       |
| pT stage                 |                          |                       | .888   |                          |                       | 1.000 |
| 1                        | 3(3.9)                   | 1(1.3)                |        | 1(3.8)                   | 1(3.8)                |       |
| 2                        | 8(10.4)                  | 3(3.9)                |        | 3(11.5)                  | 3(11.5)               |       |
| 3                        | 47(61.0)                 | 11(14.3)              |        | 9(34.9)                  | 9(34.9)               |       |
| 4                        | 2(2.6)                   | 2(2.6)                |        | 0                        | 0                     |       |
| pN stage                 |                          |                       | <0.001 |                          |                       | .411  |
| N0                       | 4(5.2)                   | 9(11.7)               |        | 3(11.5)                  | 6(23.1)               |       |
| N+                       | 56(72.7)                 | 8(10.4)               |        | 10(38.5)                 | 7(26.9)               |       |



Supplementary table S11. Sidra-LUMC AC-ICAM KRAS<sup>wt</sup> CRC chemotherapy baseline

| Clinical characteristics | Before matching (n=)(%)   |                       | P      | After matching (n=)(%)   |                       | P     |
|--------------------------|---------------------------|-----------------------|--------|--------------------------|-----------------------|-------|
|                          | No adjuvant chemo (n=111) | Adjuvant chemo (n=36) |        | No adjuvant chemo (n=18) | Adjuvant chemo (n=18) |       |
| gender                   |                           |                       | .194   |                          |                       | 1.000 |
| male                     | 54(36.7)                  | 22(15.0)              |        | 10(27.8)                 | 10(27.8)              |       |
| female                   | 57(38.8)                  | 14(9.5)               |        | 8(22.2)                  | 8(22.2)               |       |
| age                      |                           |                       | .260   |                          |                       | 1.000 |
| <50                      | 6(4.1)                    | 4(2.7)                |        | 1(2.8)                   | 1(2.8)                |       |
| ≥50                      | 105(71.4)                 | 32(21.8)              |        | 17(47.2)                 | 17(47.2)              |       |
| Tumor location           |                           |                       | .585   |                          |                       | .855  |
| Right hemicolon          | 51(34.7)                  | 15(10.2)              |        | 8(22.2)                  | 9(25.0)               |       |
| Transverse colon         | 5(3.4)                    | 1(0.7)                |        | 0                        | 0                     |       |
| Left hemicolon           | 55(37.4)                  | 20(13.6)              |        | 10(27.8)                 | 9(25.0)               |       |
| pT stage                 |                           |                       | .035   |                          |                       | .803  |
| 1                        | 8(5.4)                    | 1(0.7)                |        | 1(2.8)                   | 1(2.8)                |       |
| 2                        | 30(20.4)                  | 5(3.4)                |        | 4(11.1)                  | 5(13.9)               |       |
| 3                        | 67(45.6)                  | 26(17.7)              |        | 12(33.3)                 | 11(30.6)              |       |
| 4                        | 6(4.1)                    | 4(2.7)                |        | 1(2.8)                   | 1(2.8)                |       |
| pN stage                 |                           |                       | <0.001 |                          |                       | 1.000 |
| N0                       | 111(75.5)                 | 18(12.2)              |        | 18(50.0)                 | 18(50.0)              |       |
| N+                       | 0                         | 18(12.2)              |        | 0                        | 0                     |       |
